# Supplementary material for: Crystal structure of an archaeal CorB magnesium transporter
Source: PubMed Central journal article supplement (PMC8242095; doi:10.1038/s41467-021-24282-7), 2021-06-29
Supplement: 41467_2021_24282_MOESM1_ESM.pdf [file 41467_2021_24282_MOESM1_ESM.pdf]

# Supplementary Information

Crystal structure of an archaeal CorB magnesium transporter

Yu Seby Chen<sup>1</sup>, Guennadi Kozlov<sup>1</sup>, Brandon E. Moeller<sup>2</sup>, Ahmed Rohaim<sup>3,4</sup>, Rayan Fakh<sup>1</sup>,  
Benoît Roux<sup>3</sup>, John E. Burke<sup>2,5</sup>, Kalle Gehring<sup>1\*</sup>

<sup>1</sup>Department of Biochemistry & Centre de Recherche en Biologie Structurale, McGill  
University, Montréal, QC, Canada

<sup>2</sup>Department of Biochemistry and Microbiology, University of Victoria, Victoria, BC, Canada

<sup>3</sup>Department of Biochemistry and Molecular Biology, University of Chicago, Gordon Center for  
Integrative Science, Chicago, Illinois, USA

<sup>4</sup>Department of Biophysics, Faculty of Science, Cairo University, Egypt.

<sup>5</sup>Department of Biochemistry and Molecular Biology, The University of British Columbia,  
Vancouver, British Columbia, Canada

\*Correspondence: [kalle.gehring@mcgill.ca](mailto:kalle.gehring@mcgill.ca)

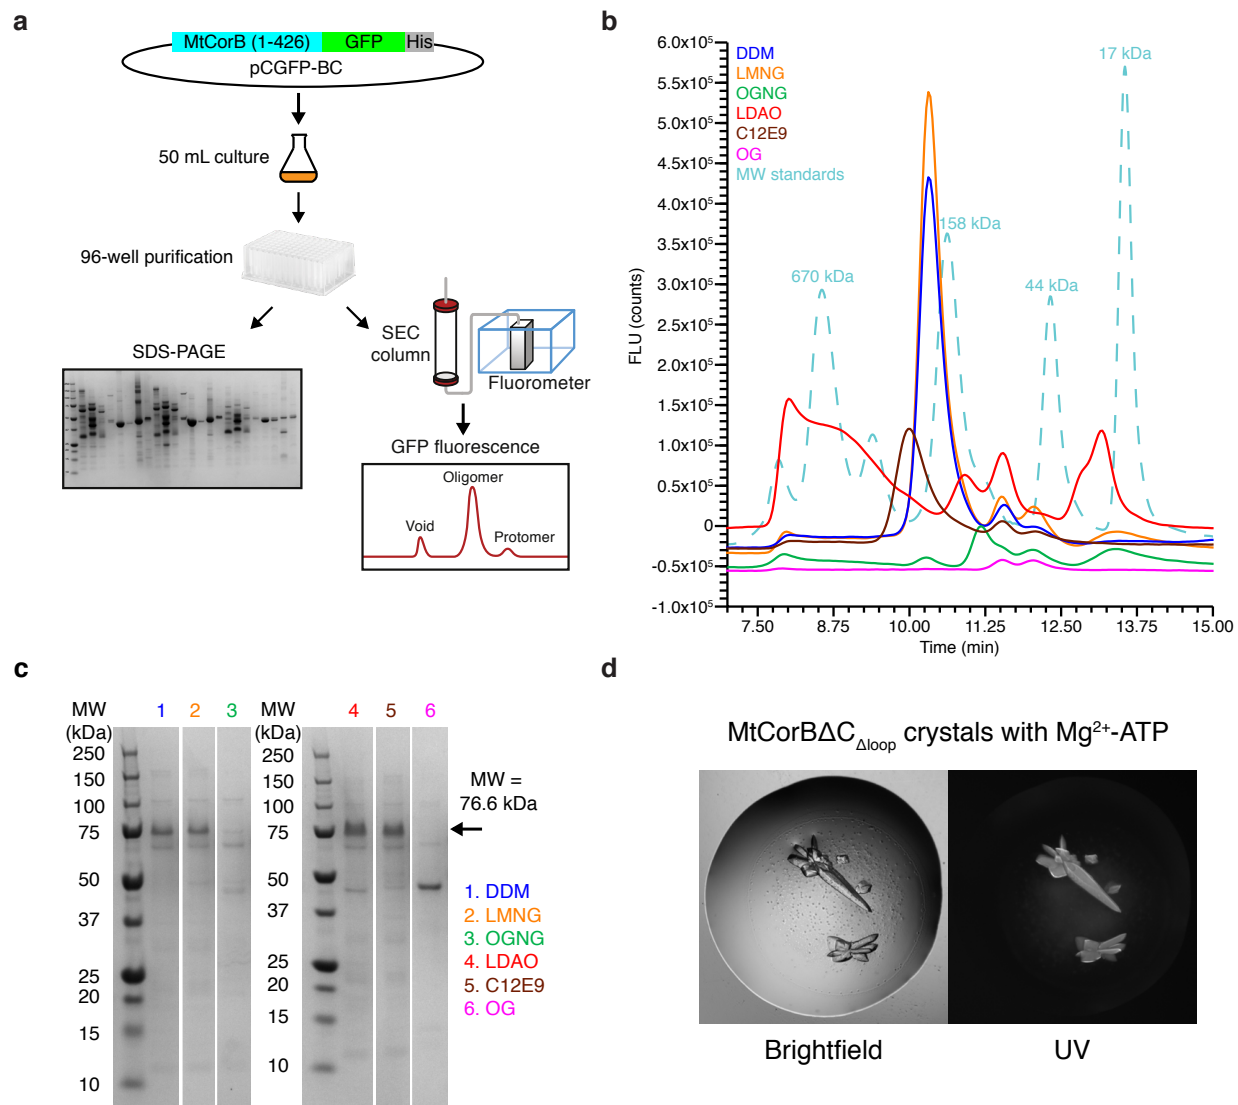

**Supplementary Figure 1. Detergent screening and crystallization of MtCorB.** **a**, Schematic of high-throughput screening process. **b**, Size-exclusion chromatography (SEC) profile of GFP-MtCorB purified in different detergents. The dashed line shows molecular weight (MW) standards. **c**, SDS-PAGE analysis of GFP-MtCorB purified in 6 detergents. This experiment was only performed once. **d**, MtCorB $\Delta$ loop crystals in complex with Mg<sup>2+</sup>-ATP taken with brightfield (*left*) and UV (*right*) camera.



**Supplementary Figure 2. Sequence alignment of CorB/CNNM orthologs from eight representative species.** The listed CorB/CNNM orthologs and their UniProt accession numbers are: MtCorB (*Methanoculleus thermophilus*; A0A1G8XA46), TtCorB (*Tepidiphilus thermophilus*; A0A0K6IWT9), CBSDUFCH2 (*Arabidopsis thaliana*; Q84R21), MAM3 (*Saccharomyces cerevisiae*; Q12296), cnm-1 (*Caenorhabditis elegans*; A3QM97), UEX (*Drosophila melanogaster*; A0A0B7P9G0), cnm2a (*Danio rerio*; A2ATX7), and CNNM2 (*Homo sapiens*; Q9H8M5). Secondary structure corresponds to the crystal structure of MtCorB $\Delta$ C. Highlighted residues: residues involved in coordinating Mg<sup>2+</sup> ion (*magenta*), polar residues in the cavity of inward-facing conformation (*blue*), polar residues in outward-facing conformation (*green*), kink-inducing residue in JM helix (*yellow*), and ATP-binding site residues (*orange*).



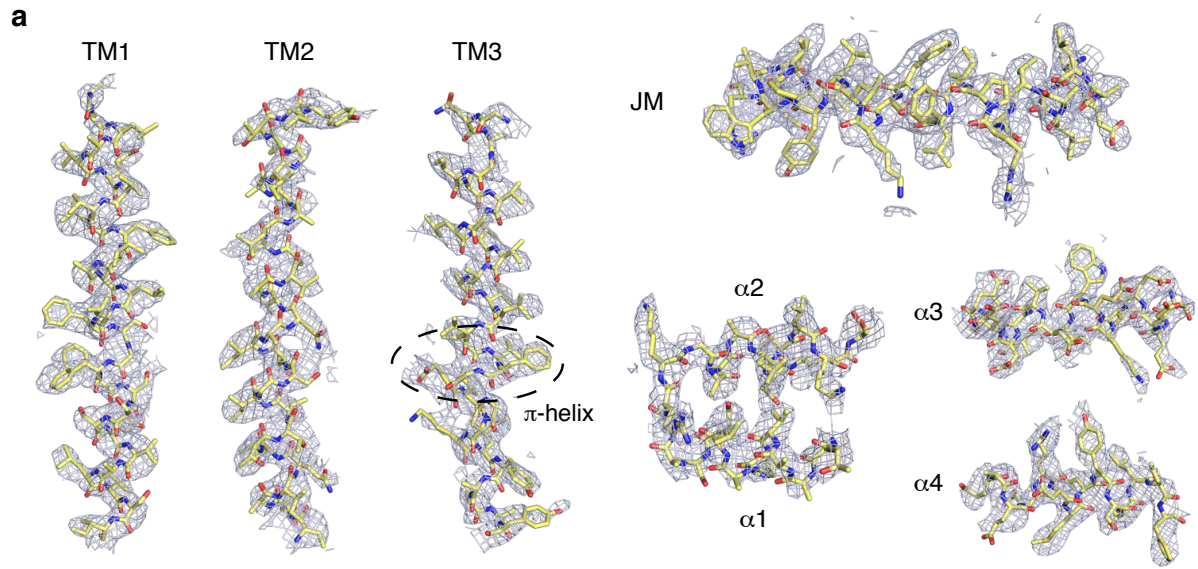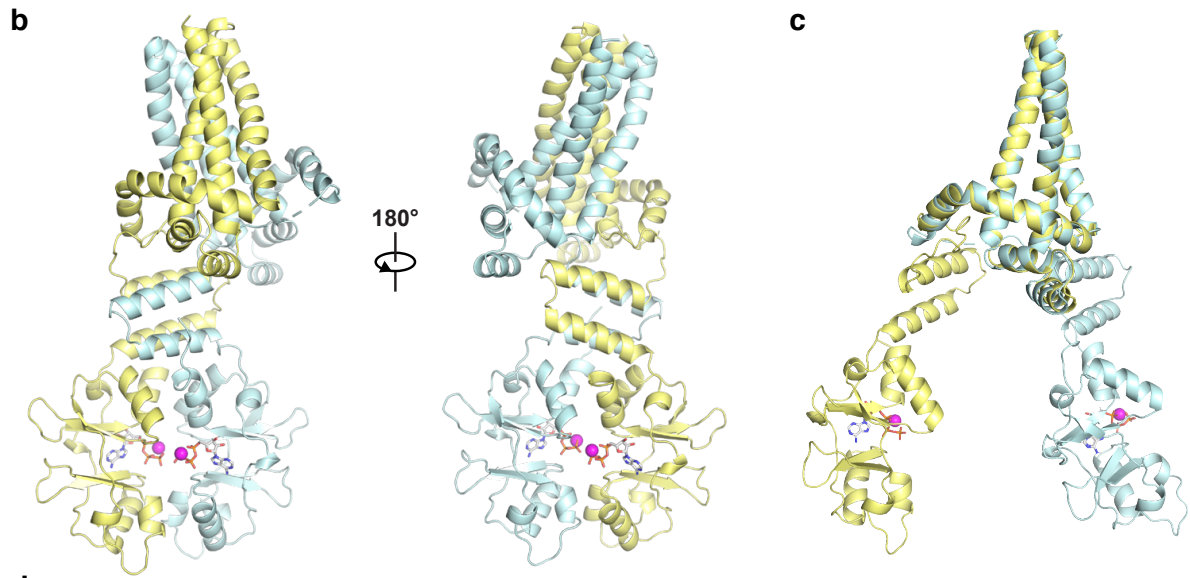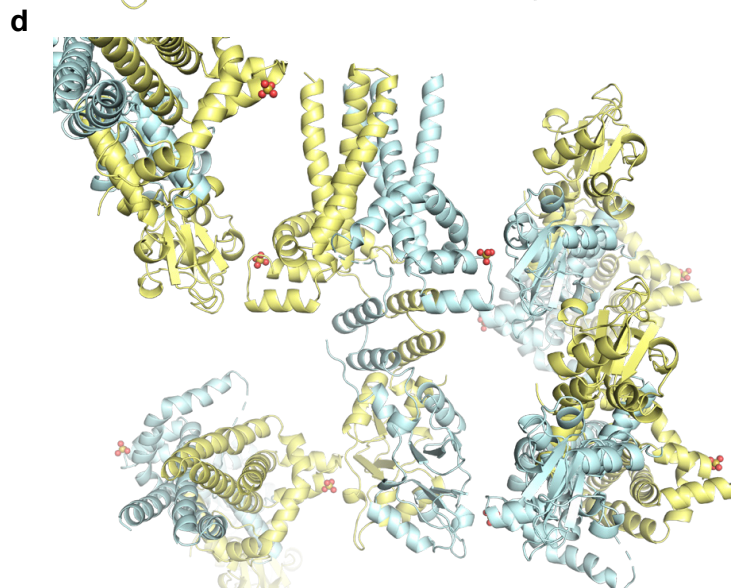

**Supplementary Figure 3. Overall structure of MtCorB $\Delta$ C bound to Mg<sup>2+</sup>ATP.**

**a**, Representative simulated annealing 2F<sub>o</sub>-F<sub>c</sub> composite omit map for TMD and AHB, contoured at 1.0  $\sigma$ . **b**, Front and rear view of the MtCorB $\Delta$ C homodimer showing asymmetry between TMD and cytosolic domains. **c**, Overlay of the TMD of the two protomers. **d**, Crystal packing is assisted with a sulfate molecule.

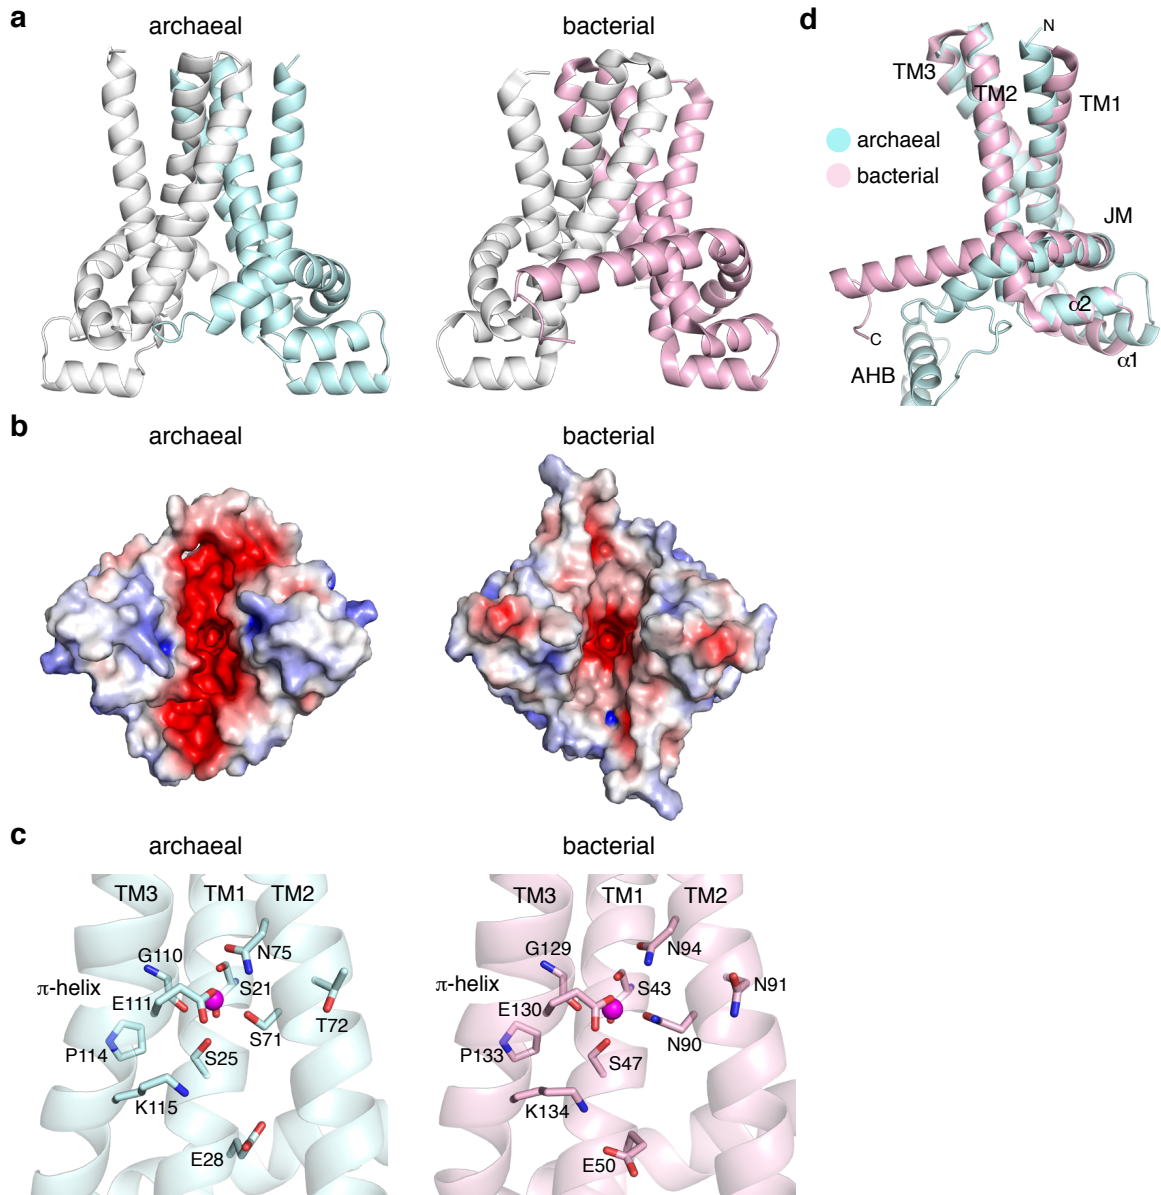

**Supplementary Figure 4. Structural comparisons of the TMD of archaeal (this work) and bacterial (PDB: 7CFF) CorB proteins. a**, TMD homodimerizes in both archaeal and bacterial CorB proteins. **b**, Electrostatic surface potential analysis ( $\pm 5 \text{ kT e}^{-1}$ ) shows conservation of negatively charged cavity in both archaeal and bacterial CorB proteins from an intracellular view. **c**, Conservation of the polar residues in the  $\text{Mg}^{2+}$  binding site and  $\pi$ -helical turn of archaeal and bacterial CorB proteins. **d**, Structural overlay of the TMD of archaeal and bacterial CorB proteins showing distinct differences in the length and orientation of the TM1 and JM helices.

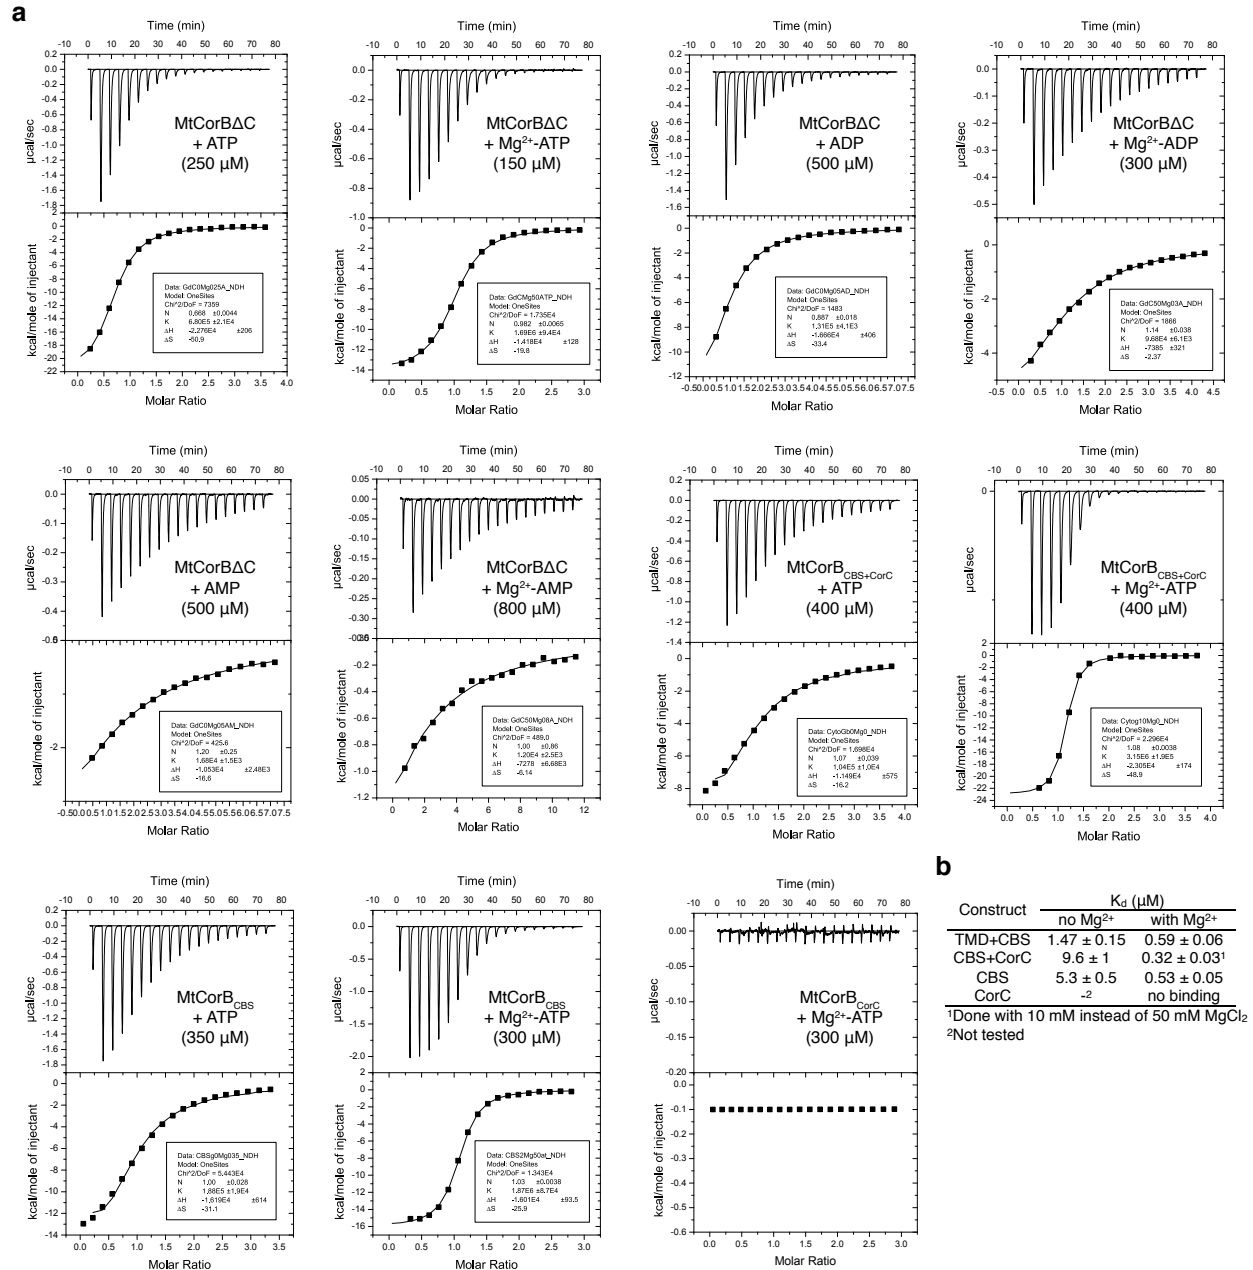

**Supplementary Figure 5. Raw ITC thermograms. a**, ITC thermograms showing various MtCorB constructs binding to adenosine nucleotides (concentrations indicated in parentheses) in absence or presence of 50 mM  $\text{MgCl}_2$ . **b**, Table summarizing the affinities of different MtCorB constructs binding to ATP in presence or absence of 50 mM  $\text{MgCl}_2$ .

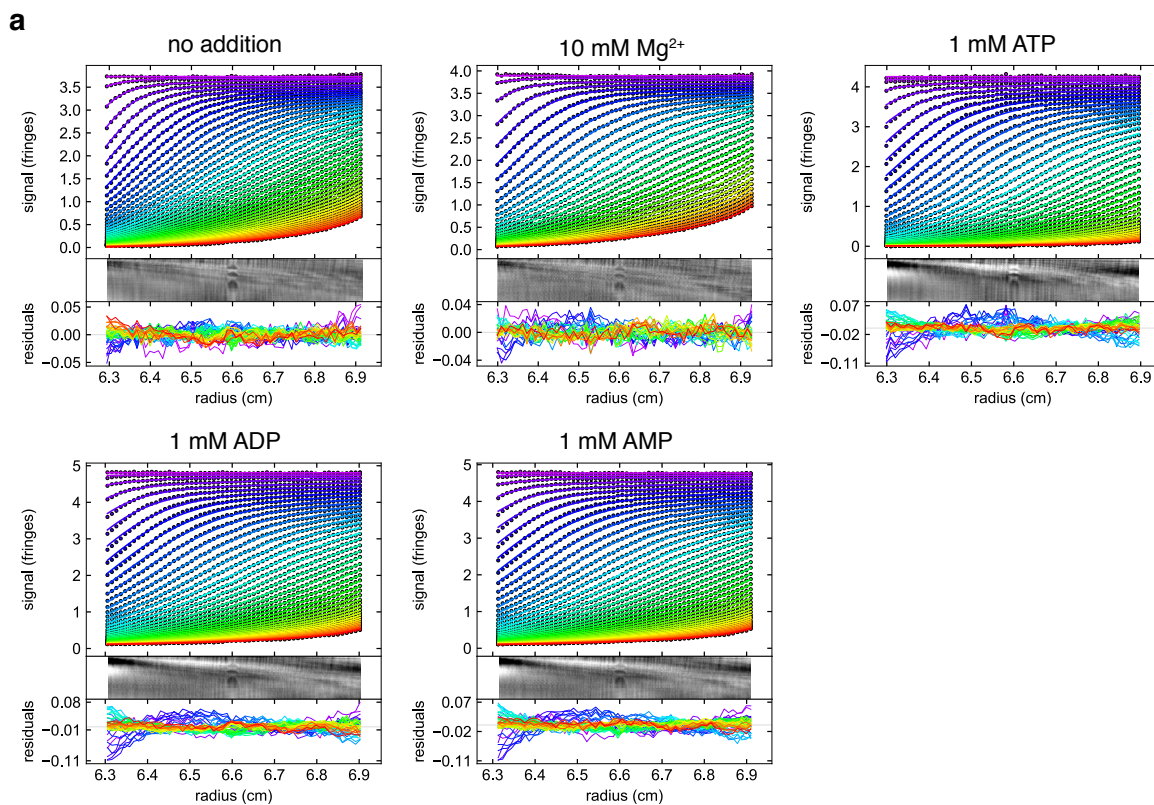

**b**

| Condition              | Sedimentation coefficient (S) |        | Estimated MW (kDa) |        | RMSD   | Theoretical MW (kDa) |       |
|------------------------|-------------------------------|--------|--------------------|--------|--------|----------------------|-------|
|                        | Peak 1                        | Peak 2 | Peak 1             | Peak 2 |        | Monomer              | Dimer |
| no addition            | 1.84                          | -      | 16.2               | -      | 0.0049 |                      |       |
| 10 mM Mg <sup>2+</sup> | 1.78                          | -      | 16.0               | -      | 0.0042 |                      |       |
| 1 mM ATP               | -                             | 2.49   | -                  | 32.0   | 0.0045 | 14.5                 | 29.0  |
| 1 mM ADP               | -                             | 2.40   | -                  | 30.4   | 0.0044 |                      |       |
| 1 mM AMP               | -                             | 2.44   | -                  | 30.9   | 0.0050 |                      |       |

**Supplementary Figure 6. Summary of SV-AUC results.** **a**, Sedimentation velocity AUC profiles of MtCorB<sub>CBS</sub> in presence of various ligands. Interference of the sample are plotted against the radial position in the cell. One in every 75 scans is plotted. **b**, Summary of experimental sedimentation coefficients and estimated molecular weights.

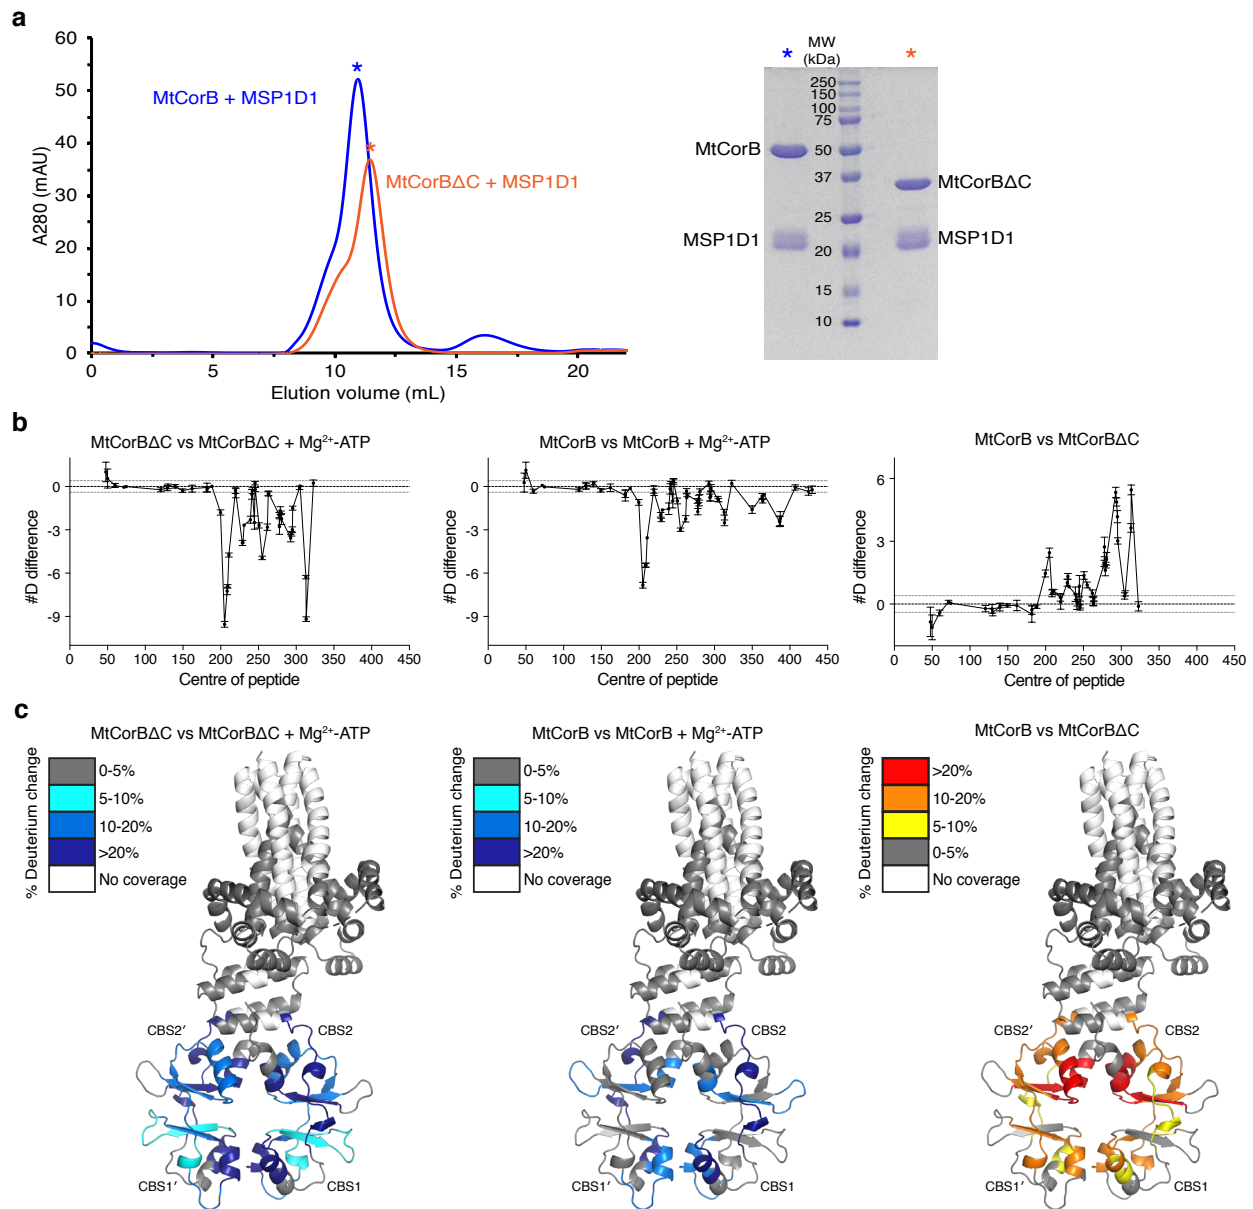

### Supplementary Figure 7. Reconstitution of MtCorB into MSP1D1 nanodiscs and HDX-MS

**analyses. a**, SEC profile and SDS-PAGE analysis of MtCorB and MtCorB $\Delta$ C reconstituted in

MSP1D1 nanodiscs. The experiment was repeated twice with similar results. **b**, HDX-MS

analysis of three sets of experiments. The sum of the # of deuterons protected from across all

timepoints is shown. Each point represents a single peptide, with them being graphed on the x-

axis according to its central residue. The data points represent mean  $\pm$  SD (n = 3 independent

measurements). **c**, Mapping of deuteration onto the structure of MtCorB $\Delta$ C. Regions that showed



significant decreases or increases in exchange (defined as >5%, 0.4 Da, and a two-tailed Student's *t*-test  $p < 0.01$ ) are colored in blue or red respectively. The source data are provided as a Source Data file.

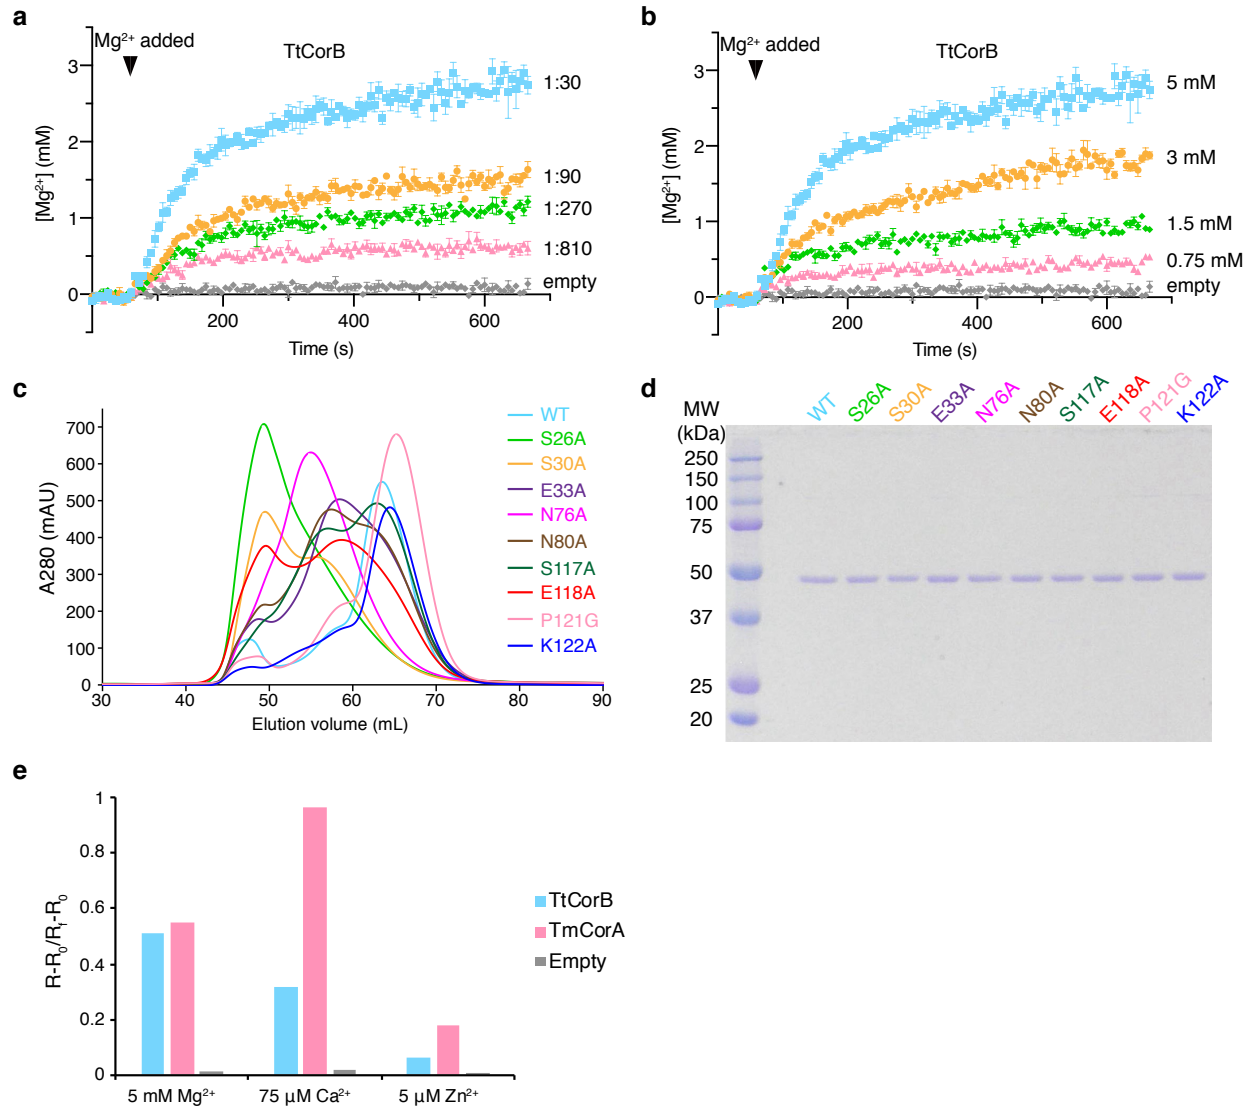

**Supplementary Figure 8. Liposome mag-fura-2 Mg<sup>2+</sup> transport assay of TtCorB proteins.**

**a**, TtCorB-incorporated proteoliposome (protein/lipid ratios of 1:30 to 1:810) shows protein-dependent Mg<sup>2+</sup> transport. The data points represent mean ± SEM (n = 3 independent measurements).

**b**, The TtCorB-mediated Mg<sup>2+</sup> transport depends on external MgCl<sub>2</sub> concentration. The data points represent mean ± SEM (n = 3 independent measurements).

**c**, SEC profiles of TtCorB mutants. The experiment was repeated twice with similar results.

**d**, SDS-PAGE analysis of proteoliposomes reconstituted with TtCorB mutants (protein/lipid ratios of 1:30).

**e**, Comparison of ion transport by TtCorB and TmCorA proteoliposomes 10 min after



addition of the indicated ions. The relative change in fluorescence is plotted with  $R =$  ratio of fluorescence with excitation at 330 nm /369 nm,  $R_0 =$  fluorescence ratio before addition of cations (final concentrations are shown), and  $R_f =$  fluorescence ratio after lysing liposomes with Triton X-100.

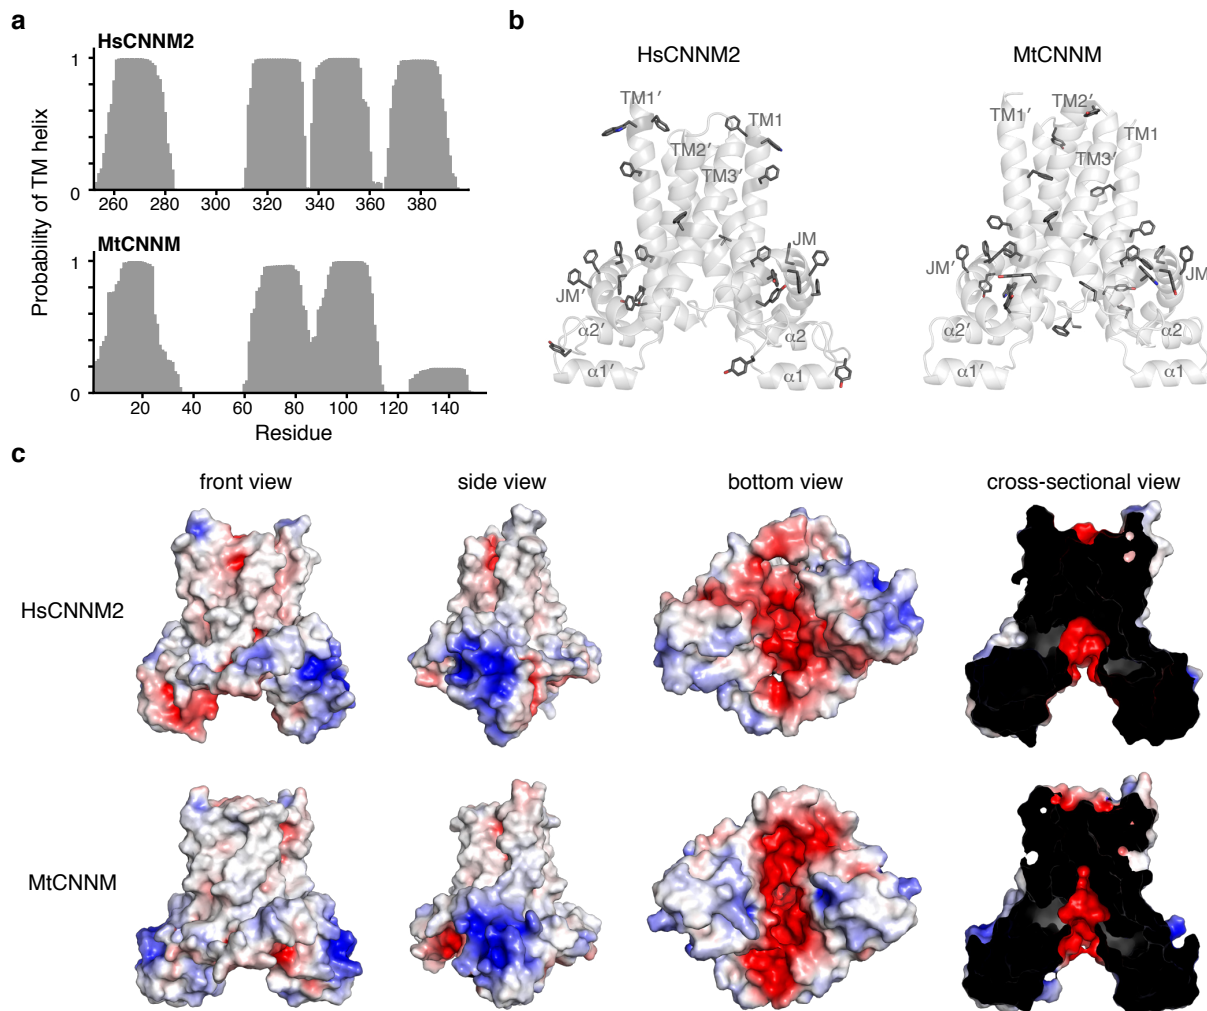

**Supplementary Figure 9. Analysis of HsCNNM2 model structure.** **a**, Prediction of transmembrane helices in human CNNM2 and archaeal MtCorB with TMHMM server. HsCNNM2 is predicted to have four TM helices. **b**, Clustering of aromatic residues at the phospholipid-solvent interface and JM helix. **c**, Comparison of the electrostatic surfaces of human and archaeal TMD ( $\pm 5 \text{ kT e}^{-1}$ ).

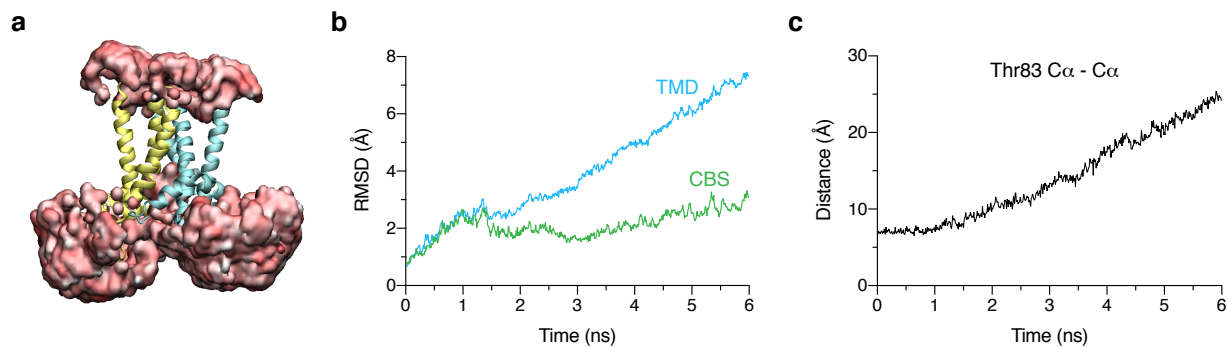

**Supplementary Figure 10. Molecular dynamics simulations of MtCorB. a,** Hydration analysis of TMD showing an inward-facing, solvent-exposed cavity. **b,** Structural deviations of TMD and CBS-pair domain during the targeted MD simulation of inward-facing to outward-facing conformation. **c,** Opening of the dimerization interface as shown by increased C $\alpha$  distances between Thr83 of both protomers.

**Supplementary Table 1. Mutagenic primers used in the study.**

| Construct       | Forward Primer                                    | Reverse Primer                                 |
|-----------------|---------------------------------------------------|------------------------------------------------|
| MtCorB Δ323-426 | catgctggaagaactggttctcgagcaccaccaccacc<br>accactg | cagtggagggtgggtggtgctcgagaaccagtctcca<br>gcatg |
| MtCorB Δ259-262 | gatgtgttctctgcgcagacctccgctacc                    | ggtagcggaggctgcgcagagaacacatc                  |
| MtCorB R235L    | gaaaccggcttctcttattcccggttaccac                   | gtggtaaaccgggataagagagaagccggttc               |
| TtCorB S26A     | gttctgctgctgaccgccggttcgctccatg                   | catggacgcgaaaccggcggcagcagcagaac               |
| TtCorB S30A     | gaccagcggttcgcggccatgtctgaaaccg                   | cggttcagacatggccgcgaaaccgctggtc                |
| TtCorB E33A     | gtttcgcgtccatgtctgcaaccgttatgatggcagc             | gctccatcataacggttcagacatggacgcgaaac            |
| TtCorB N76A     | gagcgttatcctgctggtgccaacgcggttaacgttg             | ccaacgttaaccgctggcaaccagcaggataacgctc          |
| TtCorB N80A     | ctggtaacaacgcggttgccgtggtgctgcgacc                | ggtcgcagcaccaacggcaaccgctgttaaccag             |
| TtCorB S117A    | cttctgatcctggtgttcgccgaaatcaccccgaaag             | ctttcggggtgatttcggcgaacaccaggatcaggaag         |
| TtCorB E118A    | gatcctggtgttcagcgcgaatcaccccgaaagtatc             | gataactttcggggtgattgcgctgaacaccaggatc          |
| TtCorB P121G    | gtgttcagcgaatcacccgggaaagtatcggagcgcg             | cgcgctccgataactttccgggtgatttcgctgaacac         |
| TtCorB K122A    | cagcgaatcaccccggcagttatcggagcgcgttac              | gtaacgcgctccgataactgccggggtgatttcgctg          |
